# Supplementary material for: Biological Control Effect of Antagonistic Bacteria on Potato Black Scurf Disease Caused by Rhizoctonia solani
Source: MDPI journal article supplement (doi:10.3390/agronomy14020351), 2024-02-08
Supplement: s1 [file s1]

## Supplementary Materials:

### I Corresponding chromogenic medium for 2.3.2 is as follows:

**Amylase detection medium:** 20 g starch (FuChen, China), 0.5 g  $K_2HPO_4 \cdot 3H_2O$  (GuangFu, China), 0.01 g  $FeSO_4 \cdot 7H_2O$  (Shuangshuang, China), 1 g  $KNO_3$  (Shuangshuang, China), 0.5 g NaCl, 0.05 g  $MgSO_4 \cdot 7H_2O$  (Guangnuo, China), 20 g agar, and 1 L water;

**Cellulase detection medium:** 0.5 g  $K_2HPO_4 \cdot 3H_2O$ , 0.25 g  $MgSO_4 \cdot 7H_2O$ , 2 g Gelatin (Shuangshuang, China), 1.88 g carboxymethylcellulose calcium salt (Kaixin, China), 0.2 g of congo red (Zhongqin, China), 20 g of agar and 1 L of water;

**Protease detection medium:** 20 g skim milk powder (Yili, China), 20 g agar, and 1 L water).

**Table S1.** Primer sequences of antimicrobial substance genes.

| lipopeptide                        | Primer                      |
|------------------------------------|-----------------------------|
| Surfactin                          | F-TCGGGACAGGAAGACATCAT      |
|                                    | R-CCACTCAAACGGATAATCCTGA    |
| Polyketide synthases               | F-TSGCSTGCTTGGAYGCSATC      |
|                                    | R-TGGAANCCGCCGAABCCGCT      |
| Iturin                             | F-CCCCCTCGGTCAAGTGAATA      |
|                                    | R-TTGGTTAAGCCCTGATGCTC      |
| Non-ribosomal polypeptide synthase | F- GCSTACSYSATSTACACSTCSGG  |
|                                    | R- SASGTCVCCSGTSCGCTAS      |
| Fengycin                           | F-CCTGGAGAAAGAATATACCGTACCY |
|                                    | R- GCTGGTTCAGTTKGATCACAT    |

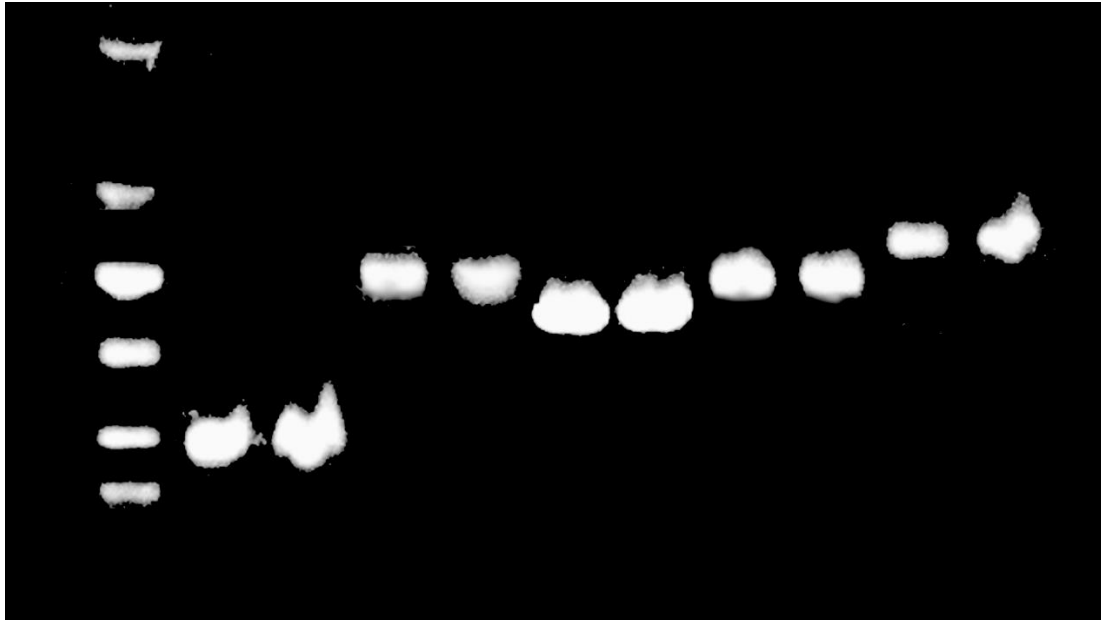

**Figure S1.** Detection of synthesis genes of antimicrobial lipopeptides of antagonistic bacteria. The bands from left to right are 2000 marker; determination of Surfactin produced by *P. polymyxa* YF; determination of Polyketide synthases produced by *P. polymyxa* YF; determination of iturin produced by *P. polymyxa* YF; determination of Non-ribosomal polypeptide synthase produced by *P. polymyxa* YF; determination of fengycin produced by *P. polymyxa* YF.
